# Supplementary material
Source: ML conference proceedings conference paper supplement (https://openreview.net/forum?id=wCKjR9LTar)

Graph Embeddings (PCA)

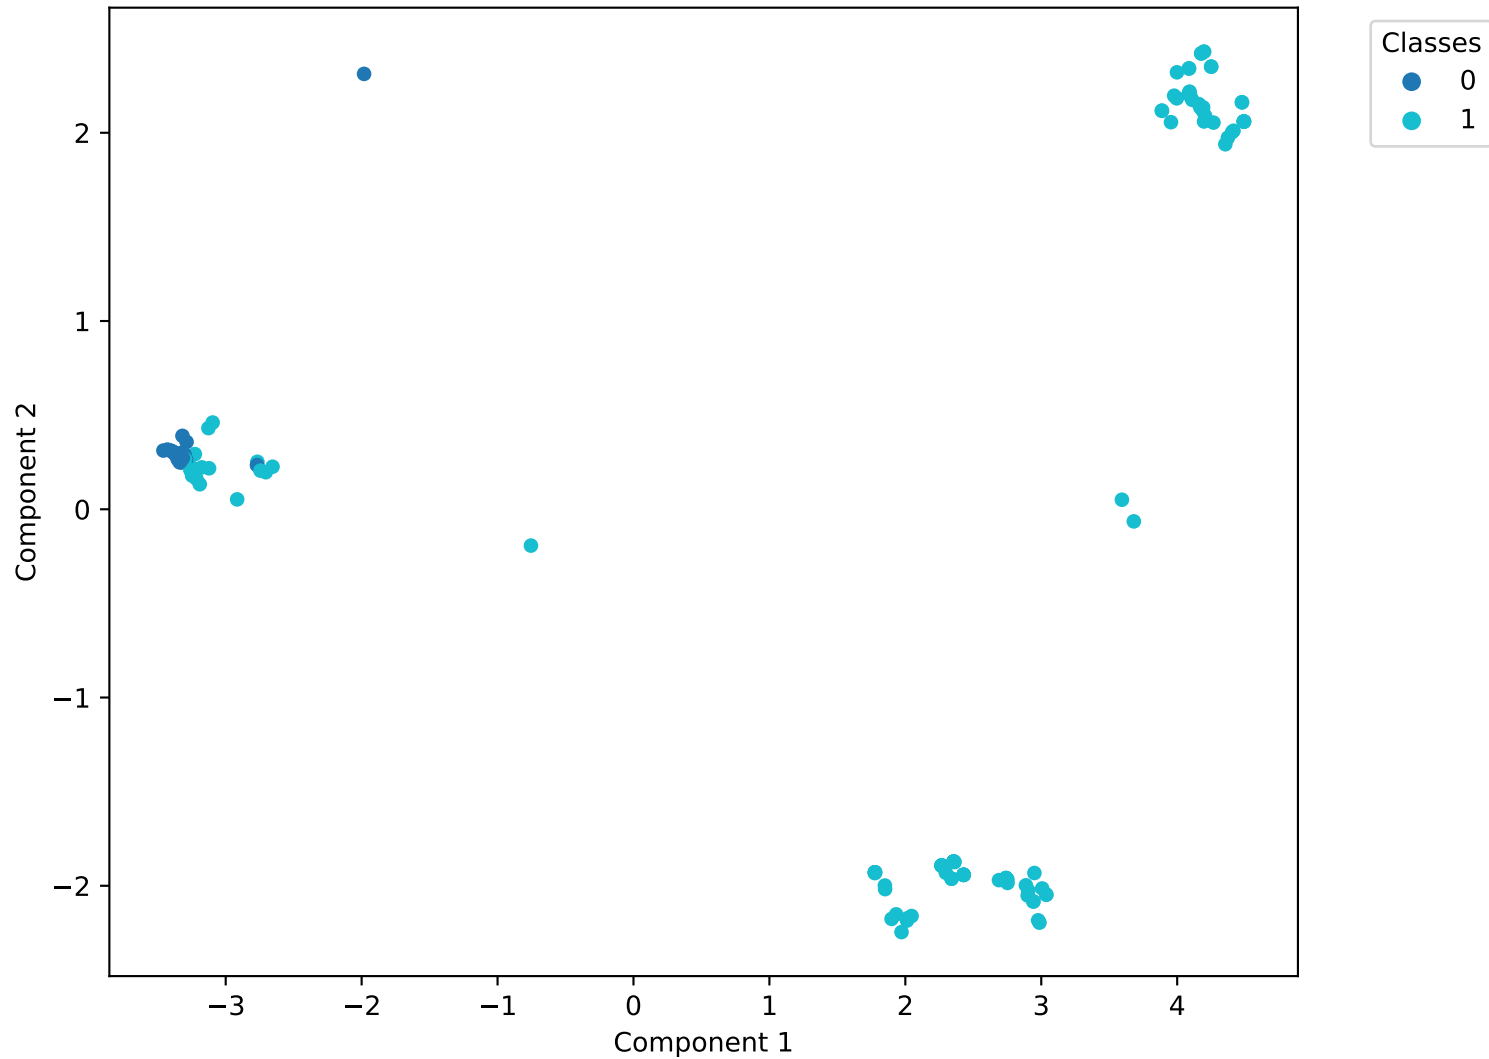

Supplement: supplementary_material [file mutag_pca.pdf › GDLNN/datasets/MUTAG/mutag_pca.pdf]

Graph Embeddings (t-SNE)

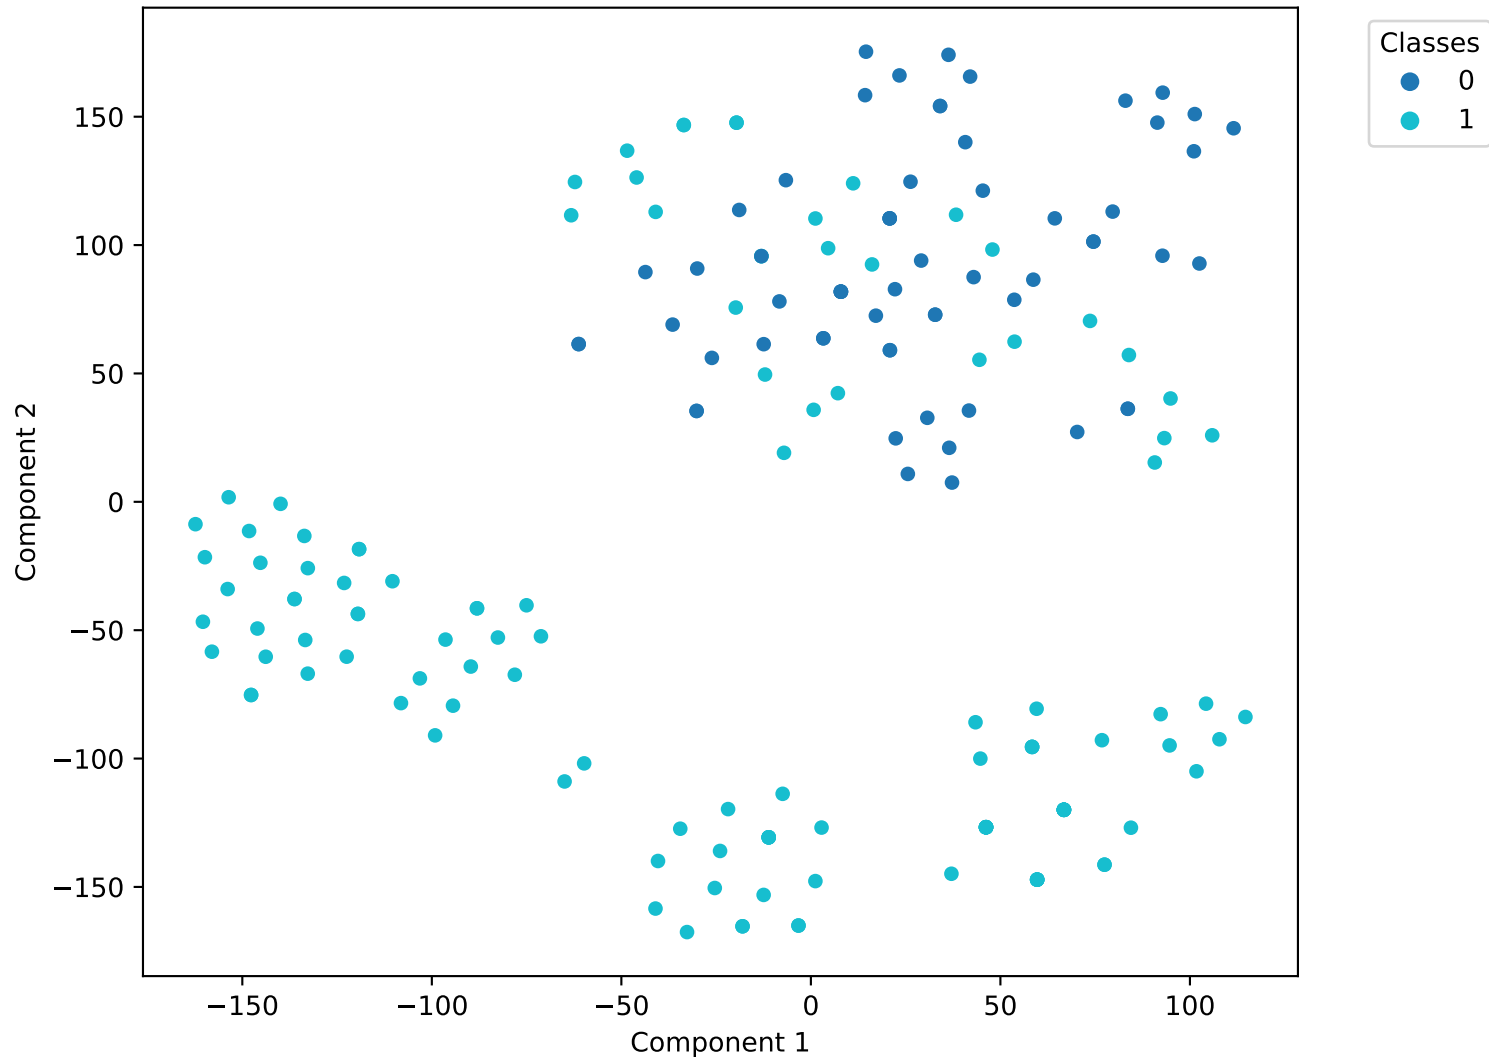

Supplement: supplementary_material [file mutag_tsne.pdf › GDLNN/datasets/MUTAG/mutag_tsne.pdf]
